# Supplementary material for: Service Integration Across Sectors in Europe: Literature and Practice
Source: PubMed Central journal article supplement (PMC6095054; doi:10.5334/ijic.3107), 2018-04-19
Supplement: ijic-18-2-3107-s1.pdf [file ijic-18-2-3107-s1.pdf]

## Appendix I. Practice template

### Practice template: Integrated Services

| 1. DETAILS CONTACT PERSON |  |
|---------------------------|--|
| Name                      |  |
| E mail & phone number     |  |
| Organisation              |  |
| Country, City             |  |

| 2. COUNTRY DESCRIPTION                                                                                                                                    |  |
|-----------------------------------------------------------------------------------------------------------------------------------------------------------|--|
| Which policies and/or legal frameworks affect the integration or cooperation of services? If so, in what way: stimulating or limiting?                    |  |
| <i>Elaborate on relevant legal framework and policymaking regarding the following levels:<br/>(Maximum 250 words per level)</i>                           |  |
| What is helpful or is a barrier regarding the national system?<br><i>Elaborate on elements of the national system that are relevant to this practice.</i> |  |

| 3. DETAILS PRACTICE                                                                                                                                                                                                                                                                  |                                        |  |
|--------------------------------------------------------------------------------------------------------------------------------------------------------------------------------------------------------------------------------------------------------------------------------------|----------------------------------------|--|
| What is the name of the practice?<br><i>Provide the name both in your own language and a translation into English</i>                                                                                                                                                                |                                        |  |
| How would you summarise the practice?<br><i>Give a short description of the integrated practices example (Maximum 250 words)</i>                                                                                                                                                     |                                        |  |
| Which phase-description suits the current status of the practice?<br><i>For a detailed description, see the background paper. Tick the box that applies to your practice, and if applicable, indicate any differences between the description and the actual practice execution.</i> | Initiative and design phase            |  |
|                                                                                                                                                                                                                                                                                      | Experimental and execution phase       |  |
|                                                                                                                                                                                                                                                                                      | Expansion and monitoring phase         |  |
|                                                                                                                                                                                                                                                                                      | Consolidation and transformation phase |  |

| 4. PRACTICE START-UP                                                                                                                                                                  |  |
|---------------------------------------------------------------------------------------------------------------------------------------------------------------------------------------|--|
| Why was it necessary to develop this practice?<br><i>Elaborate on what triggered the start of the practice, and also elaborate on why an integrated services' approach is chosen.</i> |  |
| What is the main aim of the practice?<br><i>Elaborate on the expected output in the new situation compared to the old situation.</i>                                                  |  |
| Who is the target group for the practice?<br><i>Please specify the age group and socio-demographic characteristics.</i>                                                               |  |
| What problems does the target group face?                                                                                                                                             |  |
| How does the practice fulfil the target group's needs?<br><i>Elaborate on how the stakeholders deliver integral support</i>                                                           |  |

(e.g. the actions that are carried out).

### 5. COLLABORATION STRUCTURE

On which level does the integration of public services take place: country/county/region/municipality?  
*Elaborate if possible.*

Which sectors (social services, health, education, employment /organisations/ professionals) are cooperating with each other?

Which organisations are collaborating with each other?  
*Name all the stakeholders involved.*

Who is leading the initiative and why?  
*Specify the person, function, and organization.*

How is the practice financed?  
*Elaborate on the financial structure (budget) and indicate whether or not funding is used.*

How is information regarding service users exchanged between the collaborating service providers?  
*Elaborate on aspects like care plans, decision-making, and record keeping.*

How do service providers communicate with service users?  
*Elaborate on aspects such as access to care and information via for instance contact persons.*

### 6. PRACTICE EVALUATIONS

Was the practice itself based on an already existing example?  
*Please elaborate on the origin of the practice/idea and explain to what degree, if any, the practice uses evidence-based guidelines and standards.*

How are the effects/ results of the practice measured?  
*Which instruments, infrastructure, and indicators are used for measurement?*

What were the main effects of the practice?  
*Elaborate on the impact that the practice has/had on the following groups.*  
*Please indicate whether you perceive the effect as positive or negative.*

Service users:

Their families:

Professionals:

Organisations:

What were the unexpected effects of the practice?  
*While answering, indicate whether you perceive the effect as positive or negative.*

Do you see potential to expand the practice?  
*Elaborate about the ability of the practice to be scaled up, implemented in different places/settings (e.g. other sectors, cities, countries) and explain why you think so.*

What do you perceive as the strengths of the practice?  
*Elaborate on **why** you regard these to be strengths.*

What do you perceive as the weaknesses of the practice?  
Elaborate on why you consider these to be weaknesses.

Which lessons can be learned from this practice according

|         |  |
|---------|--|
| to you? |  |
|---------|--|

| <b>REMARKS</b>                                                                                        |  |
|-------------------------------------------------------------------------------------------------------|--|
| Do you have any remaining remarks, questions, suggestions that are not included in the questionnaire? |  |
| <br><br><br>                                                                                          |  |

| <b>ATTACHMENTS</b>                                                                                       |  |
|----------------------------------------------------------------------------------------------------------|--|
| Do you have any relevant documents that can be used by ESN (and Vilans) to analyse the practice further? |  |
| Links:                                                                                                   |  |
| Attachment:                                                                                              |  |
