# Supplementary material for: Service Integration Across Sectors in Europe: Literature and Practice
Source: PubMed Central journal article supplement (PMC6095054; doi:10.5334/ijic.3107), 2018-04-19
Supplement: ijic-18-2-3107-s2.pdf [file ijic-18-2-3107-s2.pdf]

## Appendix II. Overview of included literature and practice examples

**Table I. Overview results literature review**

| <b>Article</b>                            | <b>Method</b> | <b>Country</b>    | <b>Domains</b>                                 | <b>Program name</b>                                                | <b>Target group</b> |
|-------------------------------------------|---------------|-------------------|------------------------------------------------|--------------------------------------------------------------------|---------------------|
| <i>Belling et al. (2011)</i>              | Mixed methods | England           | Social, health                                 | Community mental health teams (CMHTs)                              | Adults              |
| <i>Carlisle (2010)</i>                    | Qualitative   | Scotland          | Social, health                                 | Social Inclusion Partnership (SIP)                                 | Community           |
| <i>Collins &amp; McCray (2012)</i>        | Qualitative   | United Kingdom    | Social, health, education                      | Common Assessment Framework (CAF)                                  | Children            |
| <i>Davidson et al. (2012)</i>             | Mixed methods | Northern Ireland  | Social, health                                 | Champions Initiative                                               | Children, adults    |
| <i>Devanney &amp; Wistow (2013)</i>       | Quantitative  | England           | Social, health, education, police              | Children's Trusts                                                  | Children            |
| <i>Durie &amp; Wyatt (2012)</i>           | Qualitative   | England, Scotland | Social, health                                 | Connecting Communities (C2)                                        | Community           |
| <i>Edvardsson et al. (2011)</i>           | Qualitative   | Sweden            | Social, health, education                      | Salut Programme                                                    | Children            |
| <i>Germundsson &amp; Danermark (2012)</i> | Qualitative   | Sweden            | Social, health, employment                     | New ways to the labour market and quality assurance of cooperation | Adults              |
| <i>Golding (2010)</i>                     | Qualitative   | England           | Social, health, education                      | Integrated Service for Looked After and Adopted Children (ISL)     | Children            |
| <i>Goodman et al. (2011)</i>              | Quantitative  | England           | Social, health                                 | Interprofessional Working (IPW)                                    | Elderly             |
| <i>Green &amp; Dicks (2012)</i>           | Qualitative   | United Kingdom    | Social, health                                 | Private case management                                            | Adults              |
| <i>Hall &amp; McGarroll (2013)</i>        | Qualitative   | United Kingdom    | Social, health, education, employment, housing | Local Area Coordinators (LAC)                                      | Adults              |
| <i>Hansson et al. (2010)</i>              | Qualitative   | Sweden            | Social, health                                 | Mental health & Social care consortium                             | Adults              |
| <i>Hansson et al. (2012)</i>              | Qualitative   | Sweden            | Social, health                                 | Mental health & Social care consortium                             | Adults              |
| <i>Hendriks et al. (2012)</i>             | Qualitative   | The Netherlands   | Social, health                                 | Integrated Enabling Policies                                       | Children            |
| <i>Hunter &amp; Perkins (2012)</i>        | Qualitative   | England           | Social, health                                 | Public Health Partnerships                                         | Community           |
| <i>Kellehear (2013)</i>                   | Quantitative  | England           | Social, health, education,                     | Compassionate Communities                                          | Community           |

|                                         |               |                          | employment                            |                                                          |                  |
|-----------------------------------------|---------------|--------------------------|---------------------------------------|----------------------------------------------------------|------------------|
| <i>King et al. (2012)</i>               | Qualitative   | Scotland                 | Social, health                        | Electronic Single Shared Assessment                      | Elderly          |
| <i>Mahmud et al. (2010)</i>             | Quantitative  | Sweden                   | Social, health                        | Health Square (HS)                                       | Community        |
| <i>Manthorpe &amp; Martineau (2012)</i> | Qualitative   | England, Wales           | Social, health                        | Serious Case Review                                      | Adults           |
| <i>Molina et al. (2013)</i>             | Mixed methods | Spain                    | Social, health                        | SAIATU program                                           | Adults, elderly  |
| <i>Petch et al. (2013)</i>              | Qualitative   | United Kingdom           | Social, health                        | Health and Social Care Partnerships                      | Adults, elderly  |
| <i>Pittam et al. (2010)</i>             | Qualitative   | United Kingdom           | Social, health, employment            | Condition Management Programmes (CMPs)                   | Adults           |
| <i>Richardson et al. (2013)</i>         | Qualitative   | United Kingdom           | Social, health                        | Stepping Stones to Nature (SS2N)                         | Community        |
| <i>Rudkjobing et al. (2014)</i>         | Quantitative  | Denmark                  | Social, health                        | Health Care Agreements                                   | All              |
| <i>Sestoft et al. (2014)</i>            | Qualitative   | Denmark                  | Social, health, justice               | PSP model                                                | Adults           |
| <i>Smith &amp; Barnes (2013)</i>        | Qualitative   | United Kingdom           | Social, health, third sector          | Partnerships for Older People Projects (POPP)            | Elderly          |
| <i>Smith et al. (2013)</i>              | Mixed methods | Denmark                  | Social, employment                    | Make a Difference                                        | Adults           |
| <i>Svendsen (2010)</i>                  | Qualitative   | The Netherlands, Denmark | Social, health, education, employment | Multifunctional Centers                                  | Community        |
| <i>Taylor-Robinson et al. (2012)</i>    | Qualitative   | England                  | Social, health                        | Local Strategic Partnerships (LSPs)                      | Diverse examples |
| <i>Watson et al. (2014)</i>             | Quantitative  | United Kingdom           | Social, health, education             | Sure Start Children's Centres                            | Children         |
| <i>Webber et al. (2013)</i>             | Quantitative  | United Kingdom           | Social, health                        | Multi-agency joint protocols                             | Children         |
| <i>Wilberforce et al. (2011)</i>        | Quantitative  | England                  | Social, health                        | Community mental health teams for older people (CMHTsOP) | Elderly          |
| <i>Williams (2012)</i>                  | Qualitative   | Wales                    | Social, health                        | Community Integrated Intermediate Care Service (CIIS)    | Community        |

**Table. Overview of practices**

| <b>Ref.</b> | <b>Country</b>   | <b>Name of Practice</b>                                                                                         | <b>Target Group</b>   | <b>Domains</b>                                        |
|-------------|------------------|-----------------------------------------------------------------------------------------------------------------|-----------------------|-------------------------------------------------------|
| 1           | Belgium          | <i>Children First: Local Consultation Platforms for Prevention and Identification of Child Poverty I</i>        | Children and families | social services, education, other                     |
| 2           | Belgium          | <i>Stay On Track / Central Helpdesk<br/>Dropout prevention network with central helpdesk<br/>Youth at risk.</i> | Young people          | social services, education, employment, health, other |
| 3           | Finland          | <i>Byström youth services</i>                                                                                   | Young people          | social services, education, employment, health, other |
| 4           | Finland          | <i>Hietaniemenkatu service center</i>                                                                           | Homeless              | social services, health, other                        |
| 5           | Finland          | <i>Klubitalomenetelmä / Clubhouse model</i>                                                                     | Mental Health         | social services, education, employment, other         |
| 6           | Finland          | <i>Lafos The Labour Force Service Centre</i>                                                                    | Unemployed            | social services, health, employment, other            |
| 7           | Germany          | <i>Basic assistance for job seekers</i>                                                                         | Unemployed            | social services, education, employment, other         |
| 8           | Spain            | <i>Network of social support programmes FAISEM</i>                                                              | Mental Health         | social services, education, employment, health, other |
| 9           | Spain            | <i>Espai Cabestany</i>                                                                                          | Young people          | social services, education, employment, health, other |
| 10          | Netherlands, The | <i>'Medical Advice for Sick-reported Students', abbreviated as MASS.</i>                                        | Young people          | social services, health, education                    |
| 11          | Bulgaria         | <i>Community Mental health</i>                                                                                  | Mental Health         | social services, health, other                        |
| 12          | Denmark          | <i>Recovery approach</i>                                                                                        | Mental Health         | social services, health, employment, other            |
| 13          | Finland          | <i>Kotitori - Health and social care Integrator</i>                                                             | Older people          | social services, health, other                        |

|    |                  |                                                                |                           |                                                       |
|----|------------------|----------------------------------------------------------------|---------------------------|-------------------------------------------------------|
| 14 | France           | <i>Houses for personal autonomy</i>                            | Older people              | social services, health                               |
| 15 | France           | <i>Youth Guarantee Scheme</i>                                  | Young people              | social services, employment                           |
| 16 | Italy            | <i>Older people access to care</i>                             | Older people              | social services, health                               |
| 17 | UK               | <i>Interprofessional sessions</i>                              | All target groups         | social services, health                               |
| 18 | Sweden           | <i>Nyborg/SKIFO</i>                                            | Children and young people | social services, education, other                     |
| 19 | Sweden           | <i>SIMBA</i>                                                   | All target groups         | social services, health, education                    |
| 20 | Sweden           | <i>Social Planning Group</i>                                   | All target groups         | social services, other                                |
| 21 | Netherlands, The | <i>Employment project for (young) people with disabilities</i> | Disability                | social services, education, employment, health, other |
| 22 | UK               | <i>“Boiler on prescription” pilot</i>                          | Older people              | social services, health, housing                      |
| 23 | UK               | <i>Kent Integrated Care Pioneer</i>                            | Older people              | social services, health, other                        |
| 24 | Spain            | <i>Health and social</i>                                       | Older people              | social services, health                               |
| 25 | Belgium          | <i>Case-management</i>                                         | Unemployed                | social services, employment                           |
| 26 | Iceland          | <i>Home services</i>                                           | Older people              | social services, health                               |
| 27 | Denmark          | <i>Career plan</i>                                             | Disability                | social services, employment                           |
| 28 | Denmark          | <i>Open dialogue</i>                                           | Mental Health             | social services, health, education, employment        |
| 29 | Germany          | <i>Youth employment Agencies</i>                               | Young people              | social services, health, education, employment        |

|    |          |                                                                                                                  |                            |                                                |
|----|----------|------------------------------------------------------------------------------------------------------------------|----------------------------|------------------------------------------------|
| 30 | France   | <i>Integration Policy</i>                                                                                        | Older people               | social services, health                        |
| 31 | Slovenia | <i>Helping families at home</i>                                                                                  | All target groups          | social services, health                        |
| 32 | Poland   | <i>Workshops at schools</i>                                                                                      | Children                   | social services, education                     |
| 33 | UK       | <i>Working collaboratively to provide a wide range of day opportunities to adults with learning disabilities</i> | Disability                 | social services, health, education, other      |
| 34 | Finland  | <i>Family Net - The NGOs' Family Centre and Welfare Network –Model</i>                                           | Children and Families      | social services, health, education, other      |
| 35 | Spain    | <i>Early Childhood Intervention</i>                                                                              | Children                   | social services, health, education, other      |
| 36 | Romania  | <i>Day Care Centra for Children</i>                                                                              | Children                   | social services, health, education             |
| 37 | Hungary  | <i>Basic Access to social services</i>                                                                           | Older people               | social services, health, education             |
| 38 | Hungary  | <i>The signaling system</i>                                                                                      | Children                   | social services, education                     |
| 39 | Italy    | <i>Casa Ella Project</i>                                                                                         | Children with disabilities | social services, health, education, employment |
| 40 | Greece   | <i>FrontiZo Care</i>                                                                                             | Children                   | social services, education                     |
| 41 | Spain    | <i>ALBORADA</i>                                                                                                  | Children                   | social services, health, education, other      |
| 42 | France   | <i>LAEP</i>                                                                                                      | Children and Families      | social services, health, education, other      |
| 43 | UK       | <i>Single Assessment Tool</i>                                                                                    | Older People               | social services, health                        |
| 44 | Italy    | <i>Regional Integrated Program of Services for people with ASD (autism)</i>                                      | Mental Health              | social services, health, education, other      |
